# Supplementary material
Source: MDPI journal article supplement (https://www.mdpi.com/1424-8247/16/3/414)
Supplement: s1 [file s1]

## SUPPLEMENT 1. SEARCH STRATEGY

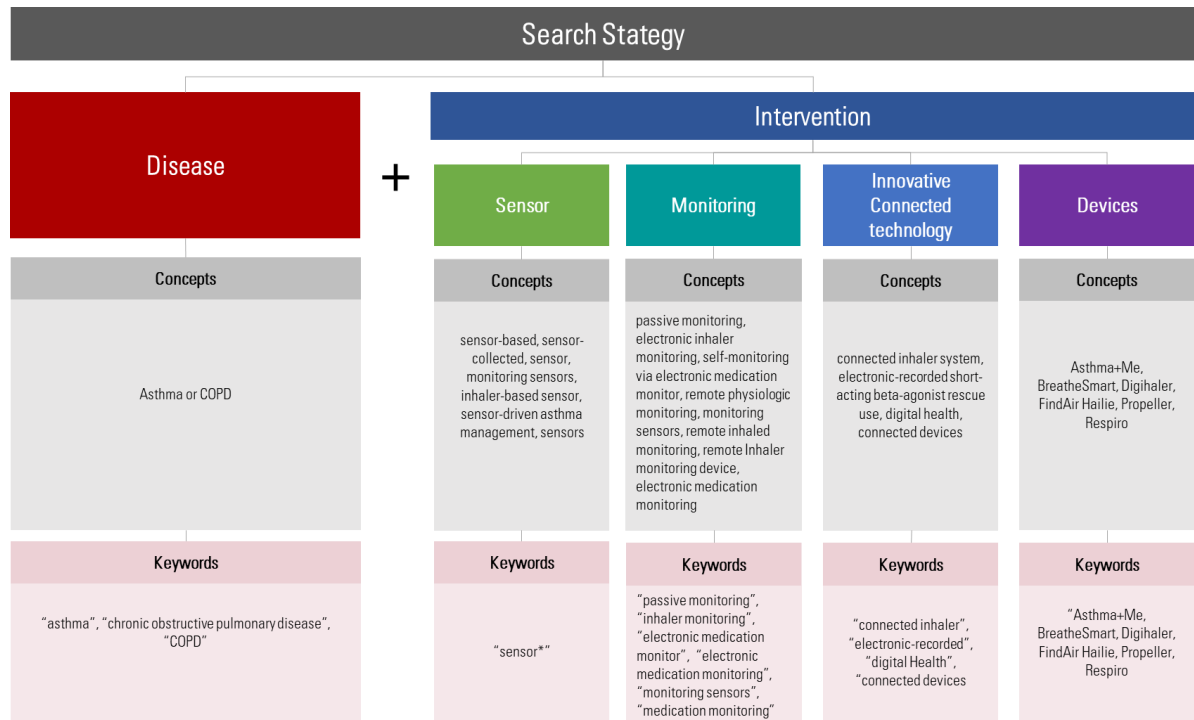

Figure. Search strategy summary

### 1. PUBMED search (filter: abstract/title):

(asthma or copd or "chronic obstructive pulmonary disease")

AND

(sensor\* OR "passive monitoring" OR "inhaler monitoring" OR "electronic medication monitor" OR "electronic medication monitoring" OR "monitoring sensors" OR "medication monitoring" OR "Connected inhaler" OR "electronic-recorded" OR "digital Health" OR "Connected devices" OR "Asthma+Me" OR "BreatheSmart" OR "Digihaler" OR "FindAir Hailie" OR "Propeller" OR "respiro")

### 2. EMBASE search (filter: abstract/title/keywords):

(asthma or copd or "chronic obstructive pulmonary disease")

AND

(sensor\* OR "passive monitoring" OR "inhaler monitoring" OR "electronic medication monitor" OR "electronic medication monitoring" OR "monitoring sensors" OR "medication monitoring" OR "Connected inhaler" OR "electronic-recorded" OR "digital Health" OR "Connected devices" OR "Asthma+Me" OR "BreatheSmart" OR "Digihaler" OR "FindAir Hailie" OR "Propeller" OR "respiro")

### 3. WEB OF SCIENCE search (filter: abstract/title):

(asthma or copd or "chronic obstructive pulmonary disease")

AND

(sensor\* OR "passive monitoring" OR "inhaler monitoring" OR "electronic medication monitor" OR "electronic medication monitoring" OR "monitoring sensors" OR "medication monitoring" OR "Connected inhaler" OR "electronic-recorded" OR "digital Health" OR "Connected devices" OR "Asthma+Me" OR "BreatheSmart" OR "Digihaler" OR "FindAir Hailie" OR "Propeller" OR "respiro")

### 4. SCOPUS search (filter: title/abstract/keywords):

(asthma or copd or "chronic obstructive pulmonary disease")

AND

(sensor\* OR "passive monitoring" OR "inhaler monitoring" OR "electronic medication monitor" OR "electronic medication monitoring" OR "monitoring sensors" OR "medication monitoring" OR "Connected inhaler" OR "electronic-recorded" OR "digital Health" OR "Connected devices" OR "Asthma+Me" OR "BreatheSmart" OR "Digihaler" OR "FindAir Hailie" OR "Propeller" OR "respiro")

### 5. COCHRANE search (filter: title/abstract/keywords):

(asthma or copd or "chronic obstructive pulmonary disease")

AND

(sensor\* OR "passive monitoring" OR "inhaler monitoring" OR "electronic medication monitor" OR "electronic medication monitoring" OR "monitoring sensors" OR "medication monitoring" OR "Connected inhaler" OR "electronic-recorded" OR "digital Health" OR "Connected devices" OR "Asthma+Me" OR "BreatheSmart" OR "Digihaler" OR "FindAir Hailie" OR "Propeller" OR "respiro")

### ADDITIONAL SEARCH

An additional search was performed including cites in reviews found in the previous search, citation examination of the selected articles and in the websites Digihaler® ([www.digihalerhcp.com](http://www.digihalerhcp.com)), HeroTracker® ([www.coherohealth.com](http://www.coherohealth.com)), Respiro Amiko® ([www.amiko.io](http://www.amiko.io)), CapMedic® ([www.capmedicinhaler.com](http://www.capmedicinhaler.com)), Turbuplus™ ([www.turbuplusinfo.co.uk](http://www.turbuplusinfo.co.uk)), Turbuplus™ ([www.turbuplusinfo.co.uk](http://www.turbuplusinfo.co.uk)), Propeller Health® ([www.propellerhealth.com](http://www.propellerhealth.com)), INCA™ ([www.incadevice.com](http://www.incadevice.com)), Hailie® ([www.hailie.com](http://www.hailie.com))
