# Supplementary material
Source: MDPI journal article supplement (https://www.mdpi.com/1424-8247/16/3/414)
Supplement: s1 [file s1]

## SUPPLEMENT 2: Variables assessed in clinical trials

| DOMAIN                         | ASSESSED OUTCOMES                                                                                                                                                                                                                    |
|--------------------------------|--------------------------------------------------------------------------------------------------------------------------------------------------------------------------------------------------------------------------------------|
| Adherence                      | - %: Moore (4-6months), Sulaiman (3 months), O'Dwyer (6 months), Broadbent (4 months), Onyirimba (10 weeks, no numerical data of the results; graphical data available)                                                              |
|                                | - Difference in mean ICS adherence (%) from baseline to the end of the study: Mosnaim (3 months period, they include data on baseline, 3 months and difference), Apter (6 months period, they include data on baseline and 6 months) |
|                                | - % of days in target range of adherence for puff inhalers (80-100%): Gregoriano (6 months)                                                                                                                                          |
|                                | - % of days in target range of adherence for dry powder (80-100%): Gregoriano (6 months)                                                                                                                                             |
|                                | - Average adherence from dose counter: Sulaiman (3 months)                                                                                                                                                                           |
|                                | - Attempted adherence rate: Sulaiman (3 months), O'Dwyer (6 months = intentional initiation of medication use at the correct time)                                                                                                   |
|                                | - Overdoses: Sulaiman (3 months)                                                                                                                                                                                                     |
|                                | - Missed doses: Sulaiman (3 months)                                                                                                                                                                                                  |
|                                | - Technique error rate: Sulaiman (3 months)                                                                                                                                                                                          |
|                                | - Adherence - Timing adherence for puff inhalers (proportion of correct dosing intervals during 24 h): Gregoriano (6 months)                                                                                                         |
|                                | - Adherence - Timing adherence for dry powder (proportion of correct dosing intervals during 24 h): Gregoriano (6 months)                                                                                                            |
|                                | - Adherence - Gaps for puff inhalers (proportion of days without inhalation): Gregoriano (6 months)                                                                                                                                  |
|                                | - Adherence - Gaps for inhalation with dry powder capsules (proportion of days without inhalation): Gregoriano (6 months)                                                                                                            |
|                                | - Adherence - Maximal gap length for puff inhalers: Gregoriano (6 months)                                                                                                                                                            |
|                                | - Adherence - Maximal gap length for dry powder capsules: Gregoriano (6 months)                                                                                                                                                      |
|                                | - Adherence - Proportion with actual adherence 80%: O'Dwyer (6 months)                                                                                                                                                               |
|                                | - Adherence - Proportion with actual adherence <50%: O'Dwyer (6 months)                                                                                                                                                              |
| Rescue Medication ("SABA use") | - Adherence - Critical technique error rate: O'Dwyer (over 6 months)                                                                                                                                                                 |
|                                | - Mean monthly % rescue free-days (6 months): Moore (comparison between groups),                                                                                                                                                     |
|                                | - SABA free days %: Merchant (analysis of difference from baseline to 12 months, data of each time in % is available), Mosnaim (from run in period to final period of 3 months, they include data on baseline and 3 months)          |
|                                | - SABA use: Merchant (Mean daily SABA use, analysis of difference from baseline to 12 months, data of each time in % is available), Onyirimba (10 weeks 24-hour and night time)                                                      |
|                                | - Mean total rescue medication use (Moore: baseline, 4-6 months)                                                                                                                                                                     |

|                  |                                                                                                                                                                                                                                             |
|------------------|---------------------------------------------------------------------------------------------------------------------------------------------------------------------------------------------------------------------------------------------|
| Symptoms Control | - ACT score: Moore (4-6 months)                                                                                                                                                                                                             |
|                  | - ACT controlled (% patients >19): Merchant (analysis in the change from baseline between the groups; baseline to 12 months)                                                                                                                |
|                  | - ACT score difference from baseline: Merchant                                                                                                                                                                                              |
|                  | - 10% increase in SABA-free days: Mosnaim (3 month)                                                                                                                                                                                         |
|                  | - ACT score improvement >3 points: Mosnaim (3 month)                                                                                                                                                                                        |
|                  | - ACT score from <20 to >20: Mosnaim (3 month)                                                                                                                                                                                              |
|                  | - ACQ: Apter (change from baseline to 6 months, data available on baseline and end of the study), Weinstein (data at baseline and 3 months)                                                                                                 |
|                  | - Asthma control improvement (composite variable): Mosnaim (3 month)                                                                                                                                                                        |
|                  | - Clinical outcomes (composite variable including adherence, PEF, AQLQ, exacerbations): Sulaiman                                                                                                                                            |
| FEV1             | - FEV1 (difference from baseline): Apter (change of % from baseline to 6 months, data available on baseline and end of the study), Onyirimba (10 weeks, only difference from baseline), Weinstein (3 months in %)                           |
| Exacerbations    | - Patients with at least 1 exacerbation: Mosnaim (3 months),                                                                                                                                                                                |
|                  | - Frequency of total exacerbations during the study period: Gregoriano (6 months), O'Dwyer (6 month)                                                                                                                                        |
|                  | - Time to next exacerbation: Gregoriano (data of the 6-month period)                                                                                                                                                                        |
|                  | - ≥1 course of oral systemic corticosteroids: Mosnaim (3 months)                                                                                                                                                                            |
|                  | - Hospitalizations or ED visits: Mosnaim (3 months)                                                                                                                                                                                         |
|                  | - ED visits for asthma: Apter (12 months, change from baseline analysis, they have data on baseline and 6 months)                                                                                                                           |
|                  | - ED visits for any cause: Apter (12 months, change from baseline analysis, they have data on baseline and 6 months)                                                                                                                        |
|                  | - Hospitalization for asthma: Apter (12 months, change from baseline analysis, they have data on baseline and 6 months)                                                                                                                     |
|                  | - Hospitalization for any cause: Apter (12 months, change from baseline analysis, they have data on baseline and 6 months)                                                                                                                  |
|                  | - Number of hospitalizations: Broadbent (4 months)                                                                                                                                                                                          |
| Quality of life  | - Number of days in hospital for respiratory problems: Broadbent (4 months)                                                                                                                                                                 |
|                  | - Quality of life (mAQLQ; difference from baseline): Apter (AQLS, difference from baseline to 6 months, data on baseline and end of the study available), Onyirimba (10 weeks, only information of the increase)                            |
|                  | - QOL (SGRQ): Gregoriano (6 months change, data available of baseline and change after 6 months), O'Dwyer (6 months change, information only of difference from baseline and only in one of the 3 groups, other groups without information) |
|                  | - Self-reported symptoms (6 months): a) cough; b) breathlessness; c) nocturnal symptoms; d) wheeze: O'Dwyer (6 months)                                                                                                                      |
|                  | - CCQ total (difference from baseline): Broadbent (4 months, data on baseline, 4 months and difference)                                                                                                                                     |

NOTE: 1. For some studies, data on several times was provided. In that case, the longer period is presented in this table; 2. In some cases, results regarding a specific variable were also reported alternatively in descriptive analysis (e.g. "descriptive analysis": % adherence vs "assessed outcome" difference in adherence). Data on the table refers to the outcomes assessed in studies.
